# Supplementary material for: 3D printed MOF-based mixed matrix thin-film composite membranes
Source: Royal Society of Chemistry journal article supplement (doi:10.1039/d1ra03124d), 2021-01-01
Supplement: d1ra03124d1.pdf [file d1ra03124d1.pdf]

**Supporting Information:**

**3D Printed MOF-based Mixed Matrix Thin-Film Composite  
Membranes**

Sameh K. Elsaidi,\* Mayur Ostwal, Lingxiang Zhu, Ali Sekizkardes, Mona H.  
Mohamed, Michael Gipple, Jeffrey R. McCutcheon,\* David Hopkinson

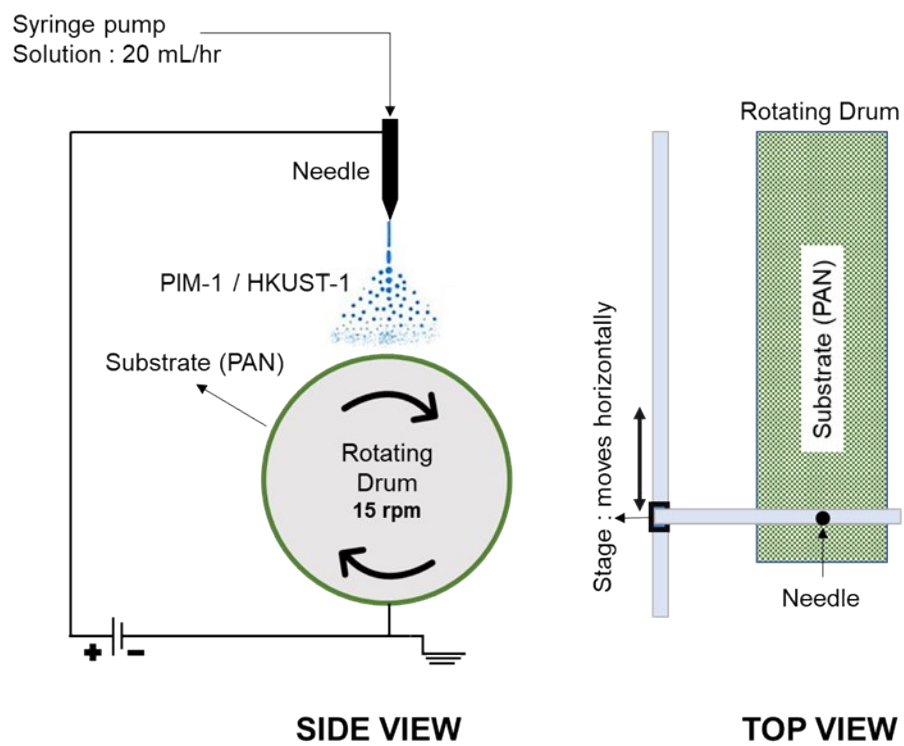

**Figure S1** : Schematic of the electrospray system.

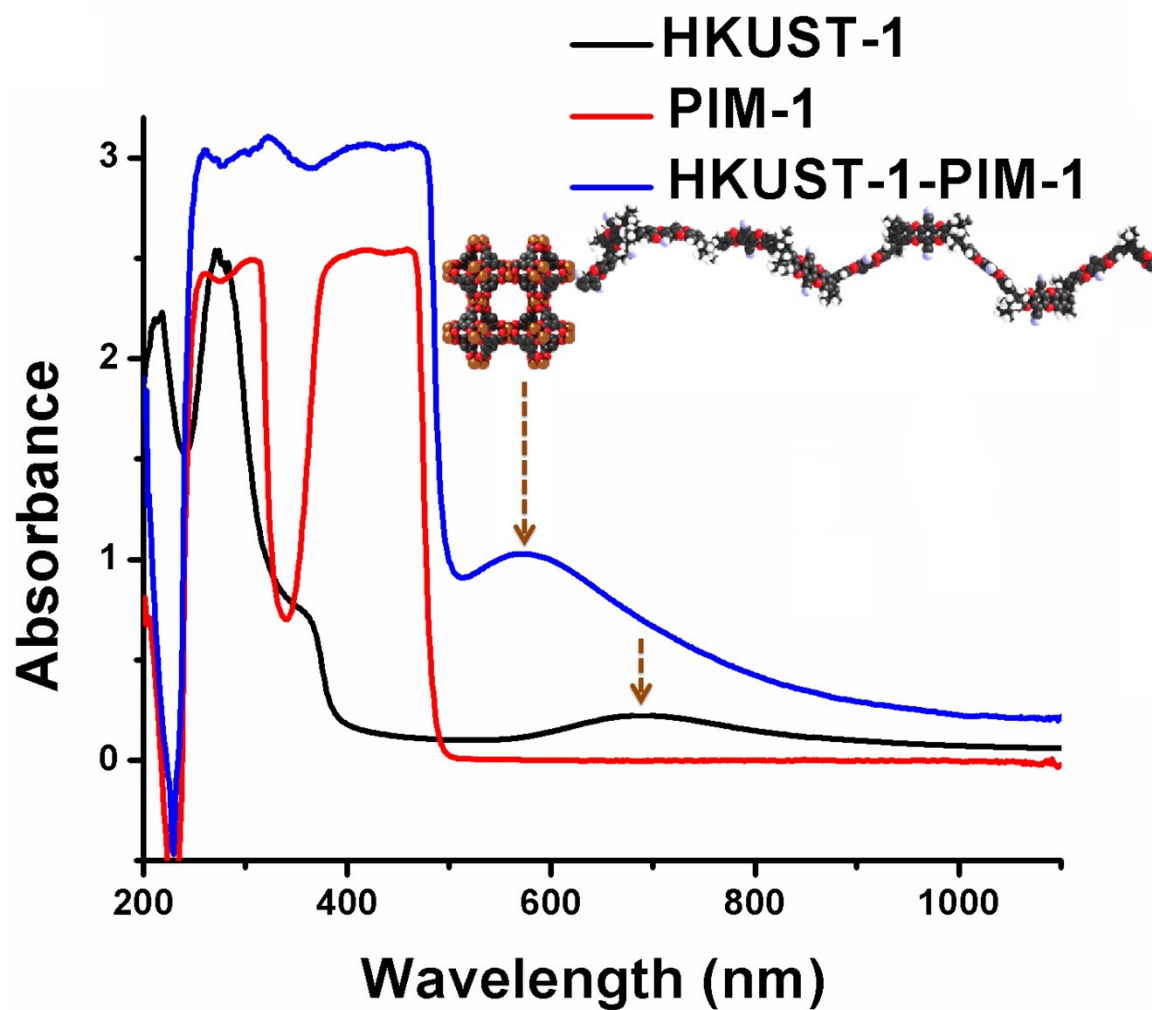

**Figure S2:** UV-VIS absorption spectra of HKUST-1-PIM-1 mixture in chloroform compared with the individual ingredients: PIM-1 and HKUST-1.

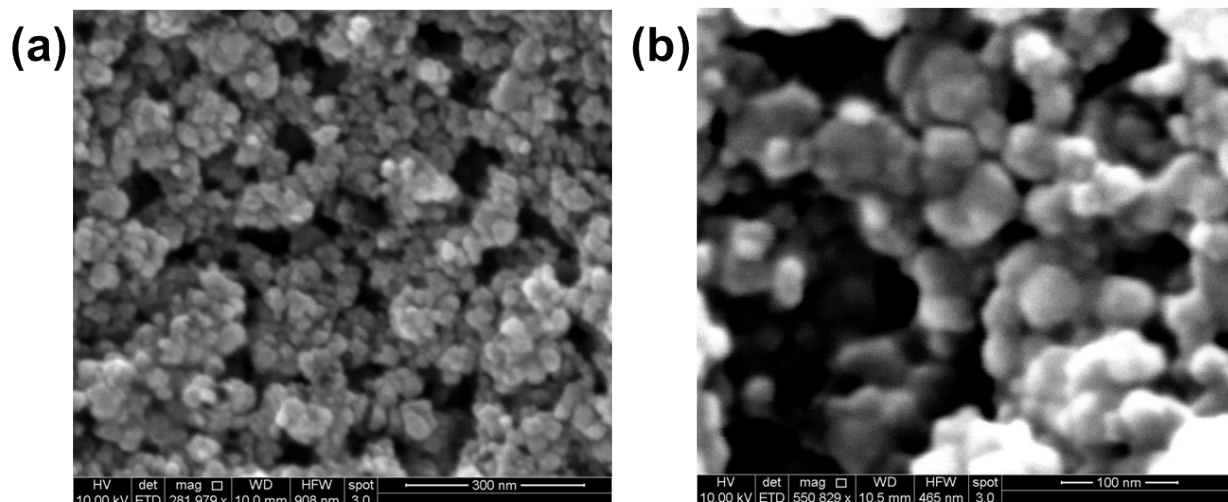

**Figure S3:** SEM images for HKUST-1 nanoparticles at different magnifications (a) 300nm, and (b) 100 nm.

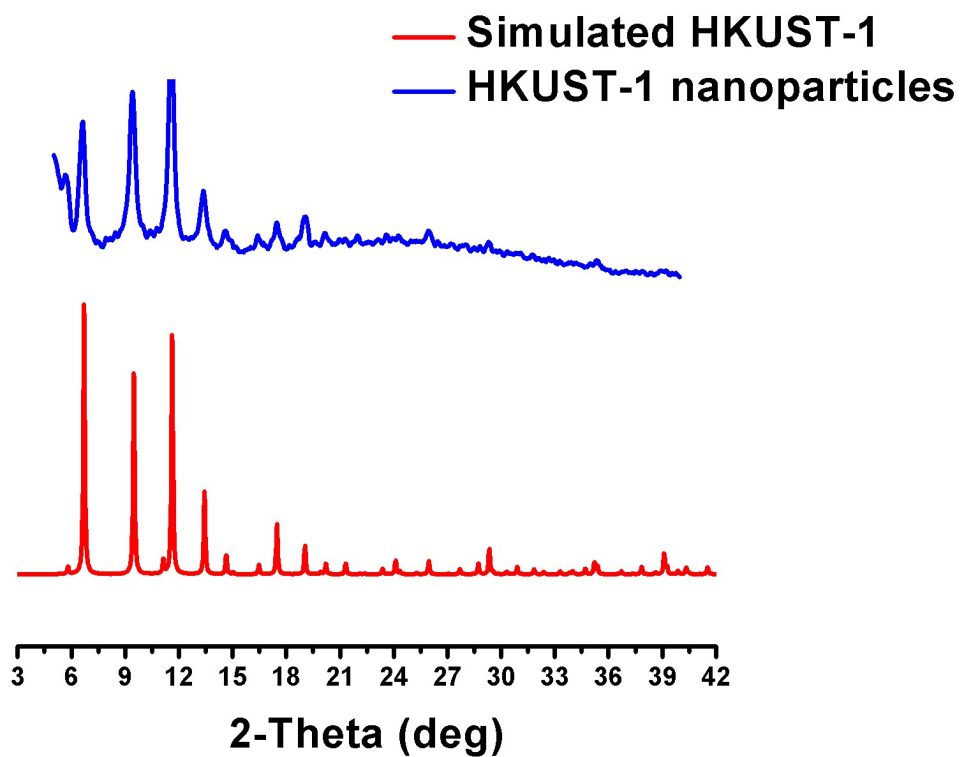

**Figure S4:** PXRD patterns for HKUST-1 nanoparticles compared to the simulated HKUST-1 from the single crystal structure.

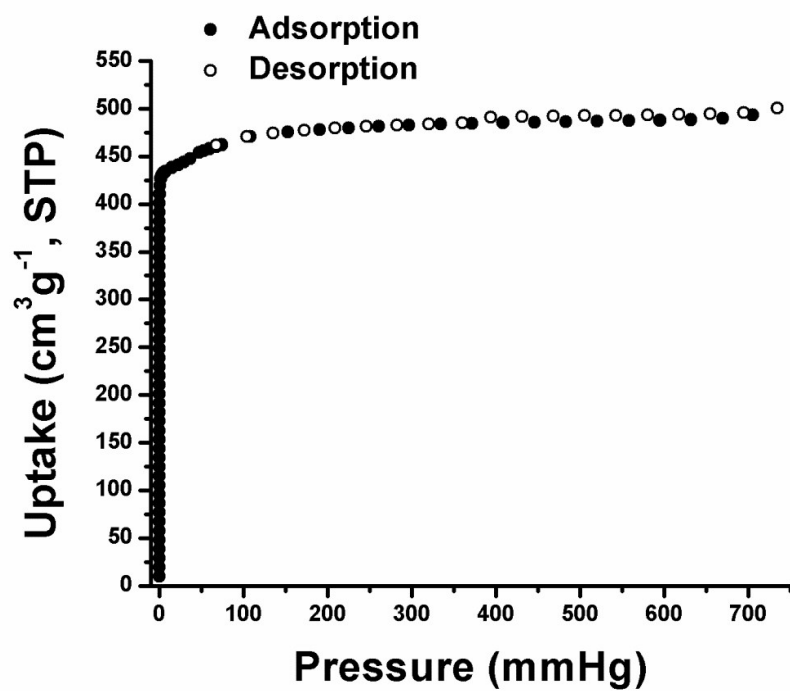

**Figure S5:** N<sub>2</sub> sorption isotherm of HKUST-1 nanoparticles collected at 77 K (BET=1869 m<sup>2</sup>/g).

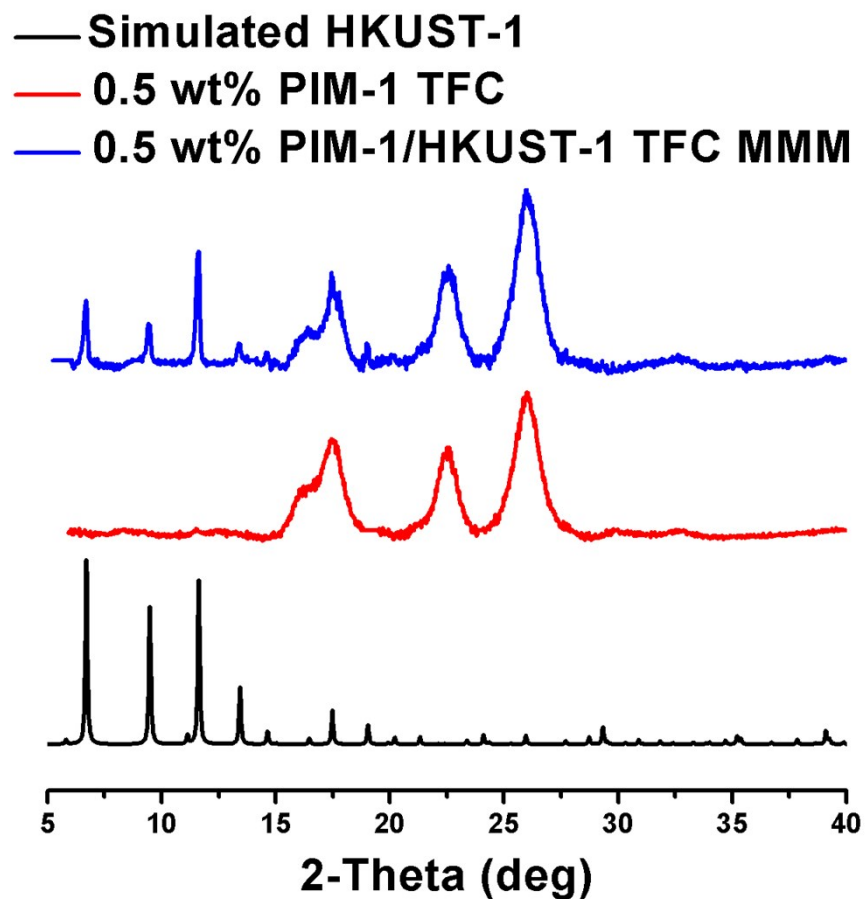

**Figure S6:** PXRD patterns for 0.5 wt% PIM-1, and 0.5 wt% PIM-1/HKUST-1 TFCs compared to the simulated HKUST-1 from the single crystal structure.

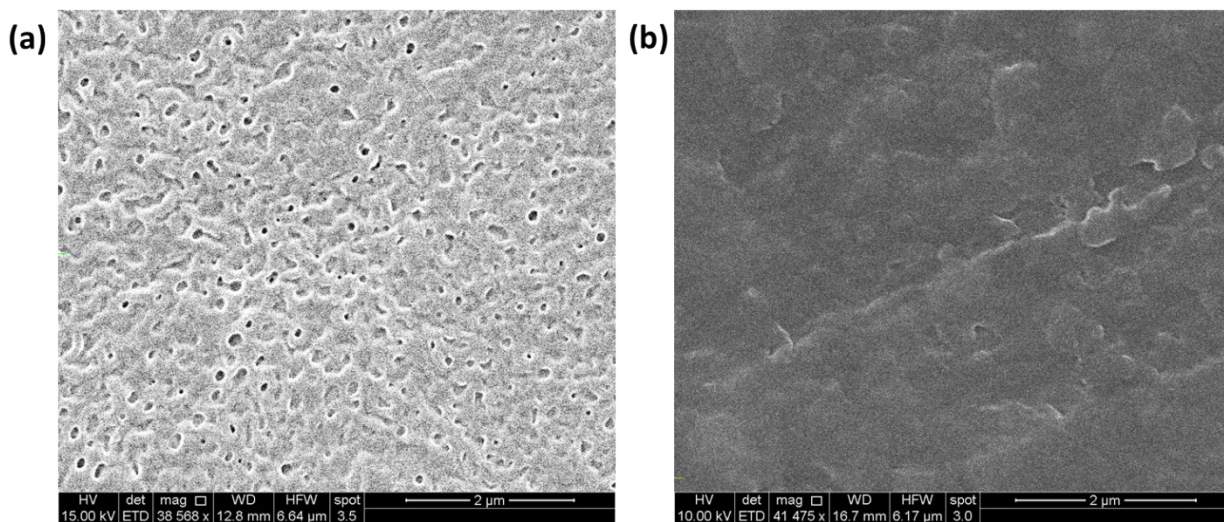

**Figure S7:** SEM surface images of the fabricated PIM-1 TFC membrane of composition of (a) 0.1 wt% and (b) 0.5 wt%.

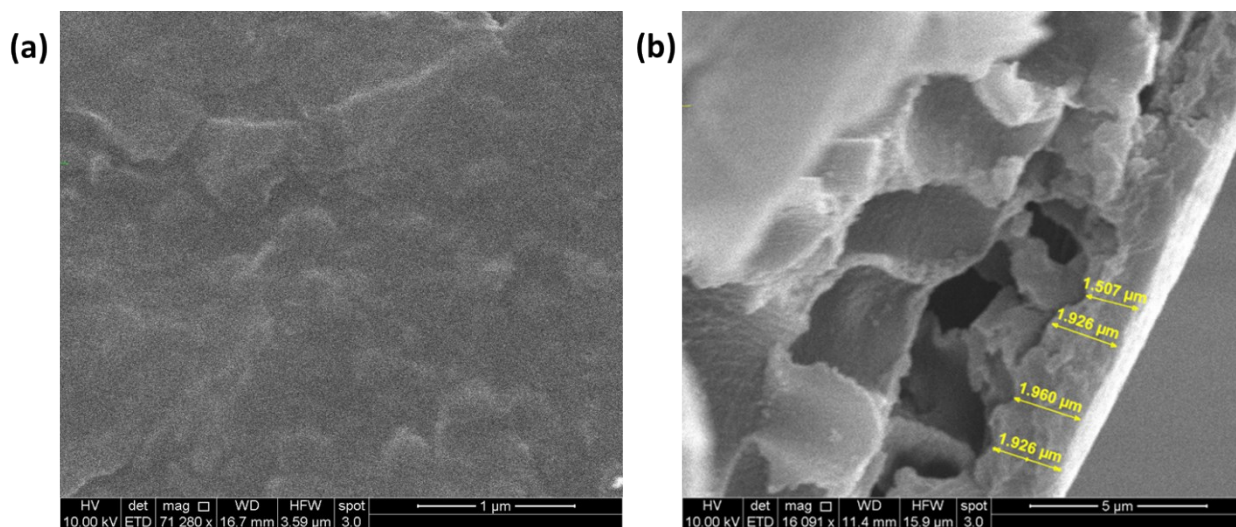

**Figure S8:** SEM images of the fabricated PIM-1 TFC membrane (2 cycles) of composition of 0.5 wt% (a) surface image and (b) cross-sectional image.

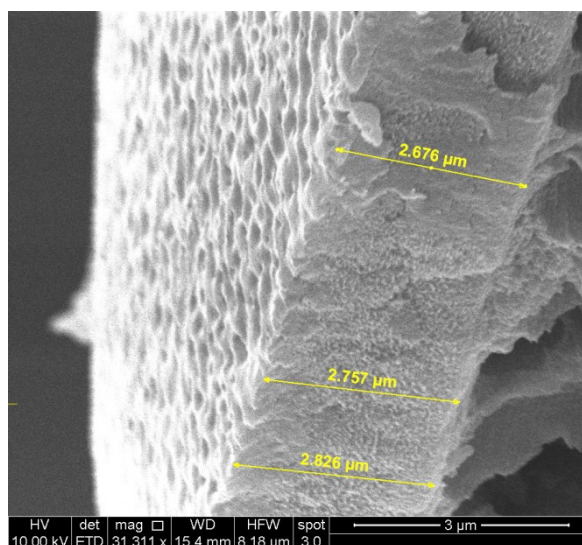

**Figure S9:** Cross-sectional SEM image of the fabricated PIM-1 TFC membrane (5 cycles) of composition of 0.5 wt%.



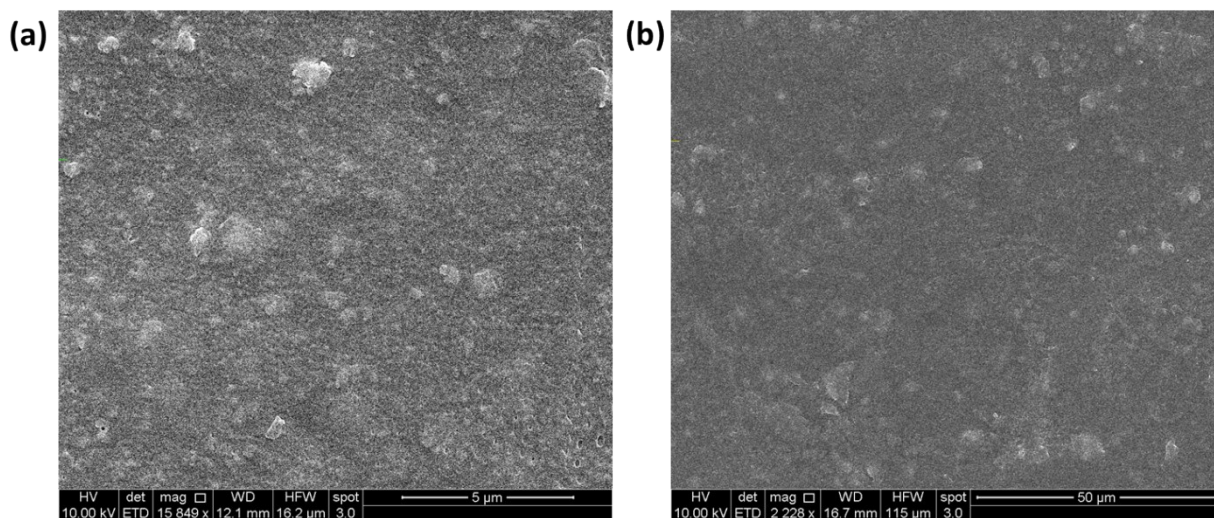

**Figure S10:** SEM surface images of the fabricated TFC MMM of composition of 0.5 wt% (a) 5 μm and (b) 50 μm.

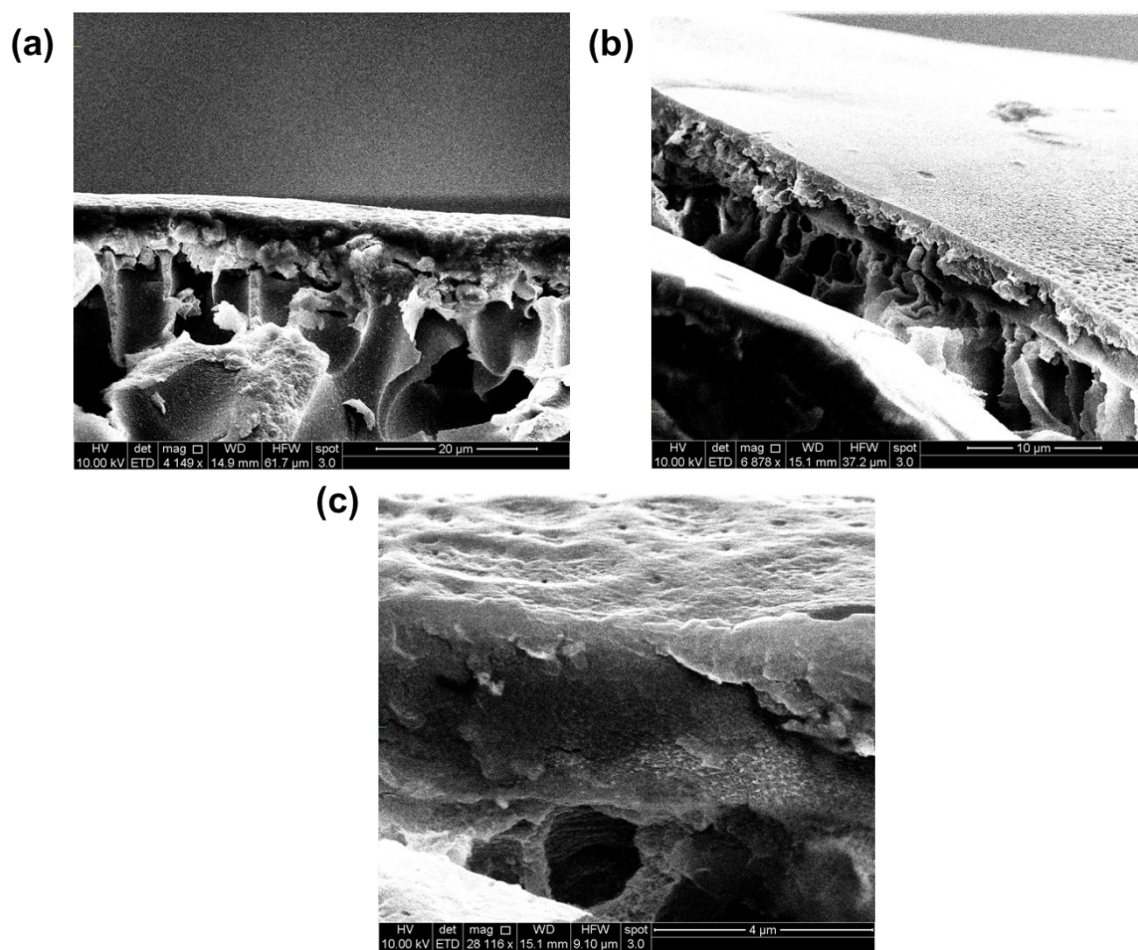

**Figure S11:** Cross-sectional SEM surface images of the fabricated TFC MMM of composition of 0.5 wt% (a) 20 μm, (b) 10 μm, and (c) 4 μm.



**Table S1:** Summary of the gas transport properties of the 3D printed TFC membranes (B# denotes to the batch number).

| <b>Sample</b>                   | <b>Thickne<br/>ss (μm)</b> | <b>wt%</b> | <b>Number of<br/>cycles</b> | <b>CO2<br/>Permeance<br/>(GPU)</b> | <b>N2<br/>Permeance<br/>(GPU)</b> | <b>CO<sub>2</sub>/ N<sub>2</sub><br/>Selectivity</b> |
|---------------------------------|----------------------------|------------|-----------------------------|------------------------------------|-----------------------------------|------------------------------------------------------|
| <b>PIM-1</b>                    | 0.39                       | 0.1        | 5                           | 147                                | 57                                | 2.6                                                  |
| <b>PIM-1/ HKUST-1</b>           | 0.5                        | 0.1        | 5                           | 305                                | 153                               | 2                                                    |
| <b>PIM-1 (B#1)</b>              | 1.8                        | 0.5        | 2                           | 271                                | 21                                | 13                                                   |
| <b>PIM-1 (B#2)</b>              | 2.75                       | 0.5        | 5                           | 159                                | 13                                | 12                                                   |
| <b>PIM-1/ HKUST-1<br/>(B#1)</b> | 2.85                       | 0.5        | 5                           | 721                                | 103                               | 7.0                                                  |
| <b>PIM-1/ HKUST-1<br/>(B#2)</b> | 2.85                       | 0.5        | 5                           | 638                                | 116                               | 5.5                                                  |
| <b>PIM1-HKUST-1<br/>(B#3)</b>   | 2.65                       | 0.5        | 5                           | 730                                | 107                               | 6.8                                                  |
